# Supplementary material for: Bacterial Cellulose-Based Nanocomposites Containing Ceria and Their Use in the Process of Stem Cell Proliferation
Source: MDPI journal article supplement (doi:10.3390/polym13121999), 2021-06-18
Supplement: s1 [file s1]

## Supplementary Information

# Green polymer-based nanocomposites containing ceria and their use in the process of stem cell proliferation

Iosif V. Gofman<sup>1,\*</sup>, Alexandra L. Nikolaeva<sup>1</sup>, Albert K. Khripunov<sup>1</sup>, Elena M. Ivan'kova<sup>1</sup>, Anton S. Shabunin<sup>2</sup>, Alexander V. Yakimansky<sup>1,3</sup>, Dmitriy P. Romanov<sup>4</sup>, Anton L. Popov<sup>5,6</sup>, Artem M. Ermakov<sup>5</sup>, Sergey O. Solomevich<sup>7</sup>, Pavel M. Bychkovsky<sup>7</sup>, Alexander E. Baranchikov<sup>6</sup>, Vladimir K. Ivanov<sup>6</sup>

<sup>1</sup> Institute of Macromolecular Compounds, Russian Academy of Sciences, 199004, Saint Petersburg, Russia; a.l.nikolaeva@imc.macro.ru (A.L.N.); ivelen@mail.ru (E.M.I.); yakimasky@yahoo.com (A.V.Y.)

<sup>2</sup> H. Turner National Medical Research Center for Children's Orthopedics and Trauma Surgery, 196603, Pushkin, Saint-Petersburg, Russia; anton-shab@yandex.ru (A.S.S.)

<sup>3</sup> Saint Petersburg State University, Institute of Chemistry, 198504, Peterhof, Saint-Petersburg, Russia

<sup>4</sup> Institute of Silicate Chemistry, Russian Academy of Sciences, 199034, Saint Petersburg, Russia; dprom@mail.ru (D.P.R.)

<sup>5</sup> Institute of Theoretical and Experimental Biophysics, 142290, Pushchino, Moscow region, Russia; antonpopovleonid@gmail.com (A.L.P.); ao\_ermakovy@rambler.ru (A.M.E.)

<sup>6</sup> Kurnakov Institute of General and Inorganic Chemistry, Russian Academy of Sciences, 119991, Moscow, Russia; a.baranchikov@yandex.ru (A.E.B.); van@igic.ras.ru (V.K.I.)

<sup>7</sup> Research Institute for Physical and Chemical Problems of the Belarusian State University, 220030, Minsk, Republic of Belarus; sergeysolomevich@gmail.com (S.O.S.); bychkovsky@tut.by (P.M.B.)

\*Correspondence: gofman@imc.macro.ru

**Table S1.** Selected gene groups for PCR-RT analysis.

| Function                                                   | Description                                                    | GeneBank  | Symbol | Forward 5'-3'            | Rewerse 5'-3'            |
|------------------------------------------------------------|----------------------------------------------------------------|-----------|--------|--------------------------|--------------------------|
| Glutathione Peroxidases (GPx)                              | Glutathione peroxidase 1                                       | NM_000581 | GPX1   | CCTCCCCTTACAGTGCTTGTC    | GCACACATGGCGCAATTG       |
|                                                            | Glutathione peroxidase 2 (gastrointestinal)                    | NM_002083 | GPX2   | CCGATCCCAAGCTCATCATT     | TCTCAAAGTTCCAGGCCACAT    |
|                                                            | Glutathione peroxidase 3 (plasma)                              | NM_002084 | GPX3   | CATCCCCTTCAAGCAGTATGCT   | GCCCGTCAGGCCTCAGTAG      |
|                                                            | Glutathione peroxidase 4 (phospholipid hydroperoxidase)        | NM_002085 | GPX4   | CCGATACGCTGAGTGTGGTTT    | GCTCCTGCTTCCCGAACTG      |
|                                                            | Glutathione peroxidase 5 (epididymal androgen-related protein) | NM_001509 | GPX5   | TCACCACACTCTCTTCTGTCAT   | AGAGTGGAATTCTGGCAGTATG   |
|                                                            | Glutathione S-transferase pi 1                                 | NM_000852 | GSTP1  | CAGGAGGGCTCACTCAAAGC     | GTGAGGTCTCCGTCCTGGAA     |
|                                                            | Glutathione transferase zeta 1                                 | NM_001513 | GSTZ1  | CCCAGAACGCCATCACTTG      | TGCCCCGCTGTGCTCTGT       |
| Peroxiredoxins (TPx)                                       | Peroxiredoxin 1                                                | NM_002574 | PRDX1  | CTGGGACCCATGAACATTCC     | AAGACCCCATTAATCCTGAGCAA  |
|                                                            | Peroxiredoxin 2                                                | NM_005809 | PRDX2  | TCCTTCGCCAGATCACTGTAA    | CAGCCGCAGAGCCTCATC       |
|                                                            | Peroxiredoxin 3                                                | NM_006793 | PRDX3  | GCATTTGAGCGTCAACGATCT    | TCACCAAGCGGAGGGTTTC      |
|                                                            | Peroxiredoxin 4                                                | NM_006406 | PRDX4  | GAGGCATCCCGGGTATCG       | GGCTTGGAATCTTCGCTTTG     |
|                                                            | Peroxiredoxin 5                                                | NM_181652 | PRDX5  | AGATGATTGCTGGTGTCCAT     | ACTATGCCATCCTGTACCACCAT  |
|                                                            | Peroxiredoxin 6                                                | NM_004905 | PRDX6  | GGCCGCATCCGTTTCC         | CCCAGGGTGGGAGAGA         |
| Other Peroxidases                                          | Catalase                                                       | NM_001752 | CAT    | CAGGCATCAAAAACCTTCTG     | CGGATGCCATAGTCAGGATCTT   |
|                                                            | Cytochrome b-245, beta polypeptide                             | NM_000397 | CYBB   | CCTTTGAGTGGTTTGCAGATCTG  | AGCCGGCATTGTTTCCTTTC     |
|                                                            | Cytoglobin                                                     | NM_134268 | CYGB   | GCAGCACCTCGAGCAGAAG      | CCTTGGCACCCAGAAATGG      |
|                                                            | Dual oxidase 1                                                 | NM_175940 | DUOX1  | TGAGCGGCACTTCCAGAAG      | GACGGCCAAAGTGGGTGAT      |
|                                                            | Dual oxidase 2                                                 | NM_014080 | DUOX2  | CCTTCGAGCCCTTCTTCAACT    | CAGCTGAACACCCCGATCTT     |
|                                                            | Lactoperoxidase                                                | NM_006151 | LPO    | CAAGCTTTTCCAGCCAACCTCA   | CCGGCAACGCTGTGTGT        |
|                                                            | Myeloperoxidase                                                | NM_000250 | MPO    | CCTGAAATTGGCGAGGAACT     | GCCGCCCATCCAGATGT        |
|                                                            | Prostaglandin-endoperoxide synthase 1                          | NM_000962 | PTGS1  | TGTTGCGGTGTCCAGTTCCAATA  | TGCCAGTGGTAGAGATGGTTGA   |
|                                                            | Prostaglandin-endoperoxide synthase 2                          | NM_000963 | PTGS2  | AATTGCTGGCAGGGTTGCT      | GGTCAATGGAAGCCTGTGATACTT |
| Other Antioxidants                                         | Albumin                                                        | NM_000477 | ALB    | TGAGAAAACGCCAGTAAGTGACA  | GAAAAGCATGGTCGCCTGTT     |
|                                                            | Apolipoprotein E                                               | NM_000041 | APOE   | CTGCGTTGCTGGTCACATTC     | CTCTGTCTCCACCGCTTGCT     |
|                                                            | Glutathione reductase                                          | NM_000637 | GSR    | TGCAGGGACTTGGGTGTGA      | GCCTTCGTTGCTCCCATCT      |
|                                                            | Metallothionein 3                                              | NM_005954 | MT3    | AGTGCGAGGGATGCAAATG      | GCCTTTGCACACACAGTCCTT    |
|                                                            | Sulfiredoxin 1                                                 | NM_080725 | SRXN1  | TGCTGTATCCCCAAGAATCATG   | GCTAGTTTGGCCCTTCTCTTC    |
|                                                            | Superoxide dismutase 1, soluble                                | NM_000454 | SOD1   | TGGTGTGGCCGATGTGTCT      | GTGCGGCCAATGATGCA        |
|                                                            | Superoxide dismutase 2, mitochondrial                          | NM_000636 | SOD2   | TCCGCAGAAAGGAACATTAAGG   | TGACCTCCATTCTTTGCTCTCA   |
|                                                            | Superoxide dismutase 3, extracellular                          | NM_003102 | SOD3   | GCGGAGCCCCAACTCTGACT     | TGCCAGATCTCCGTGACCTT     |
| Genes Involved in Reactive Oxygen Species (ROS) Metabolism | Arachidonate 12-lipoxygenase                                   | NM_000697 | ALOX12 | CCACCCACCACCAAGGAA       | TGCCGACATCAGGTAGTGA      |
|                                                            | Nitric oxide synthase 2, inducible                             | NM_000625 | NOS2   | CCGCATGACCTTGGTGTTC      | TCCAGCATCTCCTCCTGGTAGA   |
|                                                            | NADPH oxidase 4                                                | NM_016931 | NOX4   | AAGAGCCCAGATTCCAAGCTAATT | CGGCACAGTACAGGCACAAA     |
|                                                            | NADPH oxidase, EF-hand calcium binding domain 5                | NM_024505 | NOX5   | AGGCACCAGAAAAGAAAGCATACT | ATGTTGTCTTGACACCTTCGAT   |
|                                                            | Uncoupling protein 2 (mitochondrial, proton carrier)           | NM_003355 | UCP2   | CAGTTCTACACCAAGGGCTCTGA  | CCTGTGGTGCTGCCTGCTA      |
|                                                            | Aldehyde oxidase 1                                             | NM_001159 | AOX1   | GGTGTTCGCTGTTTTTCGCTAT   | GGTCCATGCAGGCCTCTCT      |

| Function                            | Description                                                        | GeneBank     | Symbol   | Forward 5'-3'             | Rewerse 5'-3'              |
|-------------------------------------|--------------------------------------------------------------------|--------------|----------|---------------------------|----------------------------|
|                                     | BCL2/adenovirus E1B 19kDa interacting protein 3                    | NM_004052    | BNIP3    | TCCATCTCTGCTGCTCTCTCATT   | AGGTTGTCAGACGCCTTCCA       |
|                                     | Epoxide hydrolase 2, cytoplasmic                                   | NM_001979    | EPHX2    | AACTGGGCCTCTCTCAAGCA      | AGCCATGTACCACACCAGCAT      |
|                                     | MpV17 mitochondrial inner membrane protein                         | NM_002437    | MPV17    | TCTATGGCCTGCTGTGCAGTT     | GGACAACGGCCAACCTGTA        |
|                                     | ATX1 antioxidant protein 1 homolog (yeast)                         | NM_004045    | ATOX1    | TGCTTGCAACCCTGAAGAAA      | GGACCAGGCCCTTGCTA          |
|                                     | Chemokine (C-C motif) ligand 5                                     | NM_002985    | CCL5     | TGCATCTGCCTCCCCATATT      | AGTGGGCGGGCAATGTAG         |
|                                     | 24-dehydrocholesterol reductase                                    | NM_014762    | DHCR24   | CATGCTGGTGCCCATGAAG       | GACGTGGATGTCGTTTTGGAA      |
|                                     | Forkhead box M1                                                    | NM_021953    | FOXM1    | AGGAAACGCTGCCCATCTC       | CGTGAGCCTCCAGGATTGAG       |
|                                     | Ferritin, heavy polypeptide 1                                      | NM_002032    | FTH1     | CTGGCTTGGCGGAATATCTCT     | GCCCGAGGCTTAGCTTTCAT       |
|                                     | Glutamate-cysteine ligase, modifier subunit                        | NM_002061    | GCLM     | CCGCCTGCGGAAGAAGT         | CATTCAAGGTTTTTTGGATACAATCA |
|                                     | Glutathione synthetase                                             | NM_000178    | GSS      | GCAGGAAAAGACACTCGTGATG    | CATGCTCGATGGCTTTGGT        |
|                                     | Heme oxygenase (decycling) 1                                       | NM_002133    | HMOX1    | TCCGATGGGTCCTTACACTCA     | GCCTGCATTACATGGCATA        |
|                                     | Heat shock 70kDa protein 1A                                        | NM_005345    | HSPA1A   | GCTGATTGGCCGCAAGTT        | TGGAAAGGCCAGTGCTTCAT       |
|                                     | Mannose-binding lectin (protein C) 2, soluble                      | NM_000242    | MBL2     | AGTGAAGGCCTTGTGTGCAAGT    | TCCATTCTCTGCAGCATTCTT      |
|                                     | NAD(P)H dehydrogenase, quinone 1                                   | NM_000903    | NQO1     | CAGCAGACGCCCCGAATTC       | TGGTGTCTCATCCCCAAATATTCTC  |
|                                     | Ring finger protein 7                                              | NM_014245    | RNF7     | AAAGGAAAGAGCTCCAAATTGAATC | CATAAGCATGCAAAAAGTTCTCTGA  |
|                                     | Sirtuin 2                                                          | NM_012237    | SIRT2    | GCTGGAACAGGAGGACTTGGT     | TGGCGTGACGCAGTGT           |
|                                     | Sequestosome 1                                                     | NM_003900    | SQSTM1   | GGAAGGTGAAACACGGACACTT    | ACGTGGGCTCCAGTTTCCT        |
| Pathway Activity<br>Signature Genes | Aldo-keto reductase family 1                                       | NM_001354    | AKR1C2   | GATTGCCCTGCGCTACCA        | TGTCTGATGCGCTGCTCATT       |
|                                     | BCL2-associated athanogene 2                                       | NM_004282    | BAG2     | CTCACCGTTGAAGTGTCAGTAGAAA | ATCAATAATCCTTGTGGCATGCT    |
|                                     | Four and a half LIM domains 2                                      | NM_001450    | FHL2     | CCTGCAGGAAGCAGCTGTCT      | AGTTCAGGCAGTAGGCAAAGTCA    |
|                                     | Galactosidase, alpha                                               | NM_000169    | GLA      | GGATGGCTCCCCAAAGAGAT      | GGCGAATCCCATGAGGAAA        |
|                                     | Heat shock protein 90kDa alpha (cytosolic), class A member 1       | NM_001017963 | HSP90AA1 | TTGGCAGTGAAGCATTTTTTCAG   | GAGCACGTCGTGGGACAAA        |
|                                     | Phospholysine phosphohistidine inorganic pyrophosphate phosphatase | NM_022126    | LHPP     | TGCGCACCGGGAAGTT          | CACGTACCCATCAGCCTTCA       |
|                                     | Trafficking protein particle complex 6A                            | NM_024108    | TRAPPC6A | GGTGTTCAGAAGCAGATGGA      | AGCTGTTGTCTTGCAGGACGTA     |
| Mitochondrial<br>dysfunction        | Mitochondrial ribosomal protein L43                                | NM_176794    | MRPL43   | CAGTTGCACCGCAGATCCT       | GGAAGATCGGATGACTGAAGTGA    |
|                                     | NADH dehydrogenase (ubiquinone) 1 beta subcomplex, 11, 17.3kDa     | NM_019056    | NDUFB11  | GCAGCACCTTTGTGGCCTAT      | TCCCATCCCACGCTCTTG         |
|                                     | Polymerase (RNA) mitochondrial (DNA directed)                      | NM_005035    | POLRMT   | CACAGGTGCTGGAAGGTTTCA     | CCGTACACCACCGTCATCAC       |
|                                     | Sirtuin 1                                                          | NM_012238    | SIRT1    | TGAGCCTGATGTTCCAGAGAGA    | AGCTTCATTAATTGCCTCTTGATCAT |
|                                     | Sirtuin 3                                                          | NM_012239    | SIRT3    | CCAGTGGCATTCCAGACTTCA     | GATCGTACTGCTGGAGGTTGCT     |
|                                     | Transcription factor B1, mitochondrial                             | NM_016020    | TFB1M    | GCCATCGAGGGCTCAGAA        | CAGCCTGCCCGTGCTTT          |
|                                     | Transcription factor B2, mitochondrial                             | NM_022366    | TFB2M    | AAGGCGTCTAAGGCCAGCTT      | TTTGCGCCAGGGTCTCA          |
|                                     | Copper chaperone for superoxide dismutase                          | NM_005125    | CCS      | GCCGCGCCATCTTCAG          | ATCAGGCTGCGGCCAAT          |
|                                     | Selenoprotein P, plasma, 1                                         | NM_203472    | SELENOS  | CTGAAACGGAAATCGGACAGA     | CGCTCTCTCACAGACAAC         |
| Anti Apoptotic                      | B-cell CLL/lymphoma 2                                              | NM_000633.2  | BCL2     | CTGGGATGCCTTTGTGGAAGT     | AGACAGCCAGGAGAAATCAAACAG   |
|                                     | aculoviral IAP repeat containing 3                                 | NM_001165.4  | BIRC3    | GGACAGGAGTTCATCCGTCAAG    | TCTCTGGGCTGTCTGATGTG       |
|                                     | myeloid cell leukemia 1                                            | NM_021960.4  | MCL1     | CACGAGACGGCCTTCCAA        | CACTCGAGACAACGATTTACATC    |

| Function      | Description                                                          | GeneBank       | Symbol  | Forward 5'-3'             | Rewerse 5'-3'           |
|---------------|----------------------------------------------------------------------|----------------|---------|---------------------------|-------------------------|
|               | TNF receptor-associated factor 2                                     | NM_021138.3    | TRAF2   | GGCCGTCTGTCCCAGTGAT       | TTCGTGGCAGCTCTCGTATTC   |
| Autophagy     | autophagy related 3                                                  | NM_022488.4    | ATG3    | CCATTGAAAATCACCTCATCTG    | CACCTCAGCATGCCTGCAT     |
|               | autophagy related 12                                                 | NM_004707.3    | ATG12   | CCCGGGAACAGAGGAACCT       | GGAGTGTCTCCCACAGCCTTT   |
|               | nuclear factor of kappa light polypeptide gene enhancer in B-cells 1 | NM_003998.3    | NFKB1   | GGCTACACCGAAGCAATTGAAG    | CAGCGAGTGGGCCTGAGA      |
|               | ribosomal protein S6 kinase, 70kDa, polypeptide 1                    | NM_003161.3    | RPS6KB1 | TGGCATAGAGCAGATGGATGTG    | AGAGTTCGGCTGTCGTATTGGA  |
| Necrosis      | coiled-coil domain containing 103                                    | NM_213607.2    | CCDC103 | GCTGCAAGGGCTTGTTTCAG      | GCCCCCTCCTTCACGGATCT    |
|               | forkhead box I1                                                      | NM_012188.4    | FOXI1   | CGCCTCACTCTCAGCCAGAT      | CCGGCCTTGCTCTTGTTGTA    |
|               | junctionophilin 3                                                    | NM_020655.3    | JPH3    | CCAGGATCACTGCCAAAGAGTT    | CGCTTCGGCCTCTGGTACT     |
|               | RAB25, member RAS oncogene family                                    | NM_020387.2    | RAB25   | TGTCTTCAAGGTGGTGCTGATC    | CGCGTGAATCGGGAGAGTAG    |
| Pro apoptotic | BCL2-associated X protein                                            | NM_004324.3    | BAX     | GTGGCAGCTGACATGTTTCTG     | GCAAAGTAGAAAAGGGCGACAA  |
|               | CD40 molecule, TNF receptor superfamily member 5                     | NM_001250.4    | CD40    | ACACTGCCACCAGCACAAATACT   | CTGTTTCTGAGGTGCCCTTCTG  |
|               | CASP8 and FADD-like apoptosis regulator                              | NM_003879.5    | CFLAR   | GTGTGTATGGTGTGGATCAGACTCA | GGCATGAATCTCCCATGAACA   |
|               | Fas cell surface death receptor                                      | NM_000043.4    | FAS     | GAATCATCAAGGAATGCACACTCA  | AAAGCCACCCCAAGTTAGATCTG |
|               | Tumor necrosis factor receptor superfamily, member 10a               | NM_003844.3    | TNFRSF1 | CTGGCGCTTGGGTCTCCTA       | TGCGTTGCTCAGAATCTCGTT   |
| House keeping | glyceraldehyde-3-phosphate dehydrogenase                             | NM_002046.5    | GAPDH   | GTGGAAGGACTCATGACCACAGT   | GCCATCACGCCACAGTTTC     |
|               | ribosomal protein, large, P0                                         | NM_001002.3    | RPLP0   | ATGCAGCAGATCCGCATGT       | TTGCGCATCATGGTGTCTT     |
|               | beta-actin                                                           | XM_006715764.1 | Actin   | TCGTGCGTGACATTAAGGAGAA    | AGCAGCCGTGGCCATCT       |
